# Supplementary material
Source: MDPI journal article supplement (https://www.mdpi.com/2073-4395/12/11/2823)
Supplement: s1 [file s1]

Supplementary materials

Article

# Nitrogen availability drives mycorrhizal effects on wheat yield, nitrogen uptake and recovery under salt stress

Dario Giambalvo, Gaetano Amato, Davide Borgia, Rosolino Ingraffia\*, Calogero Librici, Antonella Lo Porto, Guglielmo Puccio, Paolo Ruisi, Alfonso S. Frenda

Department of Agricultural, Food and Forest Sciences, University of Palermo, Viale delle Scienze, 90128 Palermo, Italy

\* Correspondence: rosolino.ingraffia@unipa.it

Table S1. ANOVA results for the studied traits.

| Response variable                   | Stress (S) | Fert (F) | Myc (M) | SxF     | SxM     | FxM    | SxFxM  |
|-------------------------------------|------------|----------|---------|---------|---------|--------|--------|
| AM fungi colonization               | 0.0043     | 0.1025   | -       | 0.0278  | -       | -      | -      |
| Shoot                               | <0.0001    | 0.0030   | 0.0823  | 0.0098  | 0.0113  | 0.0123 | 0.6078 |
| Green leaves                        | 0.1677     | 0.3104   | 0.3733  | 0.5438  | 0.8968  | 0.8204 | 0.7942 |
| Leaf Area                           | <0.0001    | <0.0001  | 0.3334  | 0.0001  | 0.0022  | 0.5432 | 0.3796 |
| Specific Leaf Area                  | <0.0001    | 0.0389   | 0.4266  | 0.1048  | 0.0342  | 0.0975 | 0.2389 |
| MSI                                 | <0.0001    | 0.8175   | 0.7115  | 0.3372  | 0.0487  | 0.5353 | 0.3569 |
| SPAD values                         | 0.0001     | 0.0039   | 0.9535  | 0.9671  | 0.6406  | 0.8366 | 0.6516 |
| Root                                | <0.0001    | 0.3228   | 0.7045  | 0.2508  | 0.3301  | 0.7482 | 0.4655 |
| N concentration                     | <0.0001    | <0.0001  | 0.4346  | <0.0001 | <0.0001 | 0.3578 | 0.0009 |
| N uptake                            | <0.0001    | <0.0001  | 0.0562  | 0.0475  | 0.4311  | 0.0232 | 0.4978 |
| <sup>15</sup> N fertilizer recovery | <0.0001    | -        | 0.3477  | -       | 0.0474  | -      | -      |
| WUE                                 | <0.0001    | 0.0033   | 0.2102  | 0.0185  | 0.0177  | 0.1149 | 0.5902 |

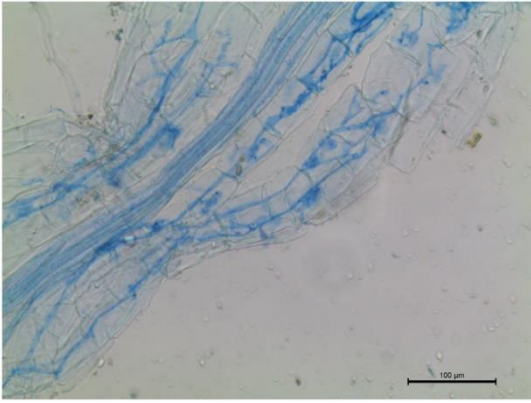

Figure S1. Durum wheat root colonized by arbuscular mycorrhizal fungi. The bar indicates 100  $\mu\text{m}$ .

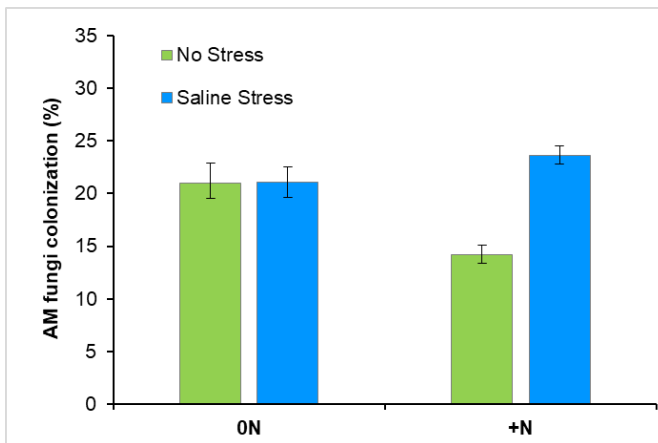

Figure S2. Arbuscular mycorrhizal fungi root colonization of durum wheat in the two fertilization treatments (0N and +N) and in presence or absence of saline stress. Vertical bars represent standard error (N = 6).
